# Supplementary material for: Synthesis of novel inhibitors of β-glucuronidase based on the benzothiazole skeleton and their molecular docking studies
Source: Royal Society of Chemistry journal article supplement (doi:10.1039/c5ra23072a), 2015-12-23

# Supporting Data

## Synthesis of Novel Inhibitors of $\beta$ -glucuronidase Based on the Benzothiazole Skeleton and their Molecular Docking Studies

**Muhammad Taha<sup>\*a,b</sup>, Nor Hadiani Ismail<sup>a,b</sup>, Syahrul Imran<sup>a,b</sup>, Manikandan Selvaraj<sup>c,d</sup>, Fazal Rahim<sup>e</sup>**

<sup>a</sup>Atta-ur-Rahman Institute for Natural Product Discovery, Universiti Teknologi MARA (UiTM), Puncak Alam Campus, 42300 Bandar Puncak Alam, Selangor, Malaysia

<sup>b</sup>Faculty of Applied Science UiTM, 40450 Shah Alam, Selangor, Malaysia

<sup>c</sup>Integrative Pharmacogenomics Institute (iPROMISE), Universiti Teknologi MARA (UiTM), Puncak Alam Campus, 42300 Bandar Puncak Alam, Selangor Darul Ehsan, Malaysia

<sup>d</sup>Faculty of Pharmacy, Universiti Teknologi MARA (UiTM), Puncak Alam Campus, 42300 Bandar Puncak Alam, Selangor Darul Ehsan, Malaysia

<sup>f</sup>Department of Chemistry, Hazara University, Mansehra-21120, Pakistan

---

\* Correspondence and reprints  
E-mail: [taha\\_hej@yahoo.com](mailto:taha_hej@yahoo.com) and muhamm9000@puncakalam.uitm.edu.my, Tel: 0060193098141

# Compound 1

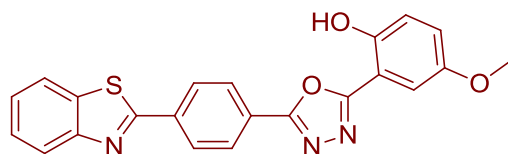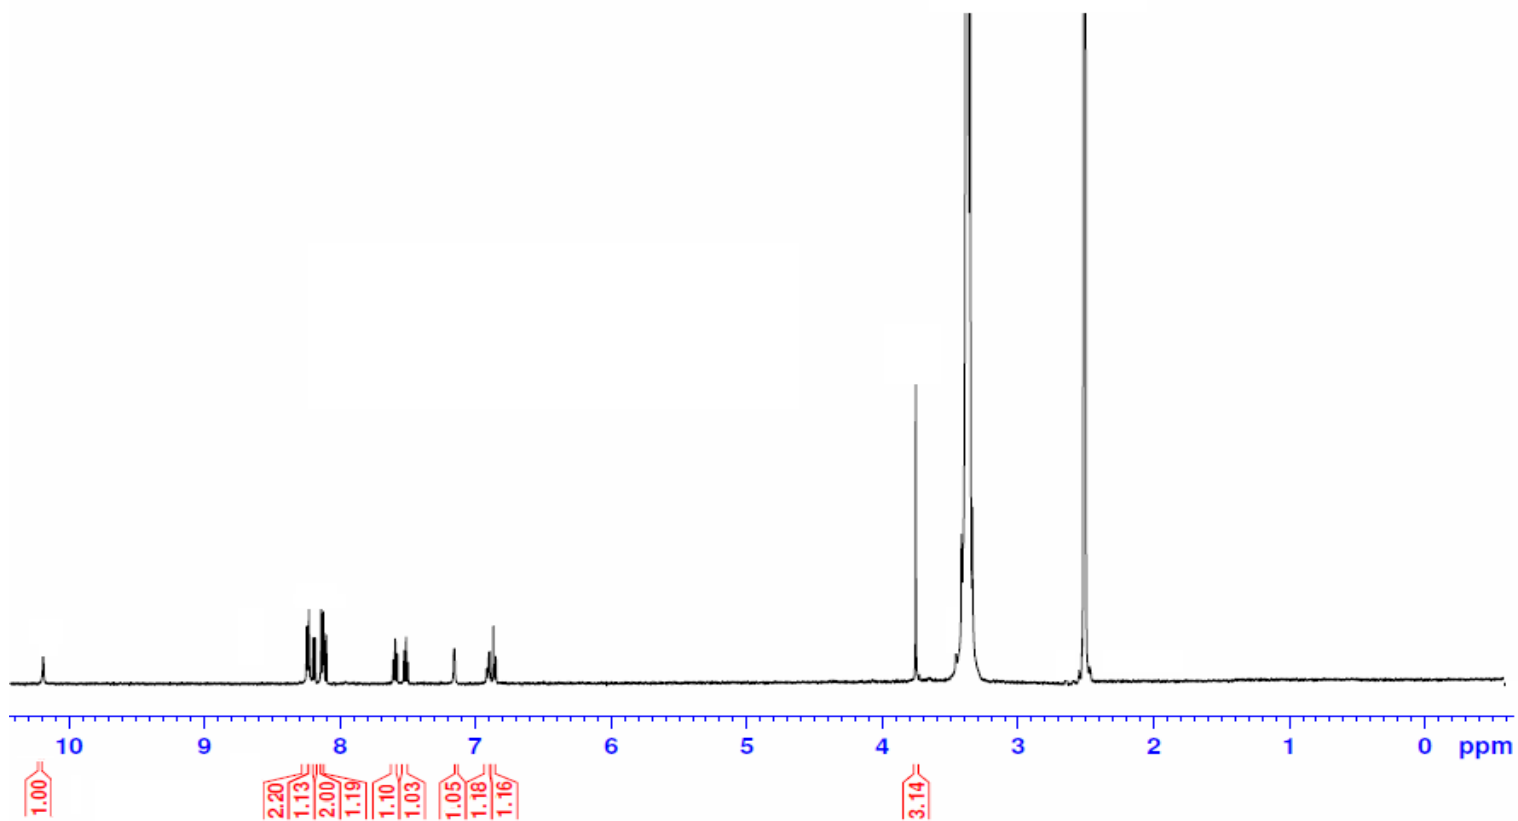

### Compound 2

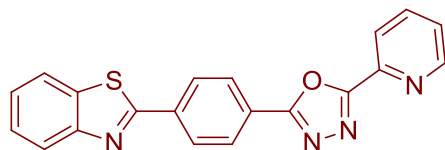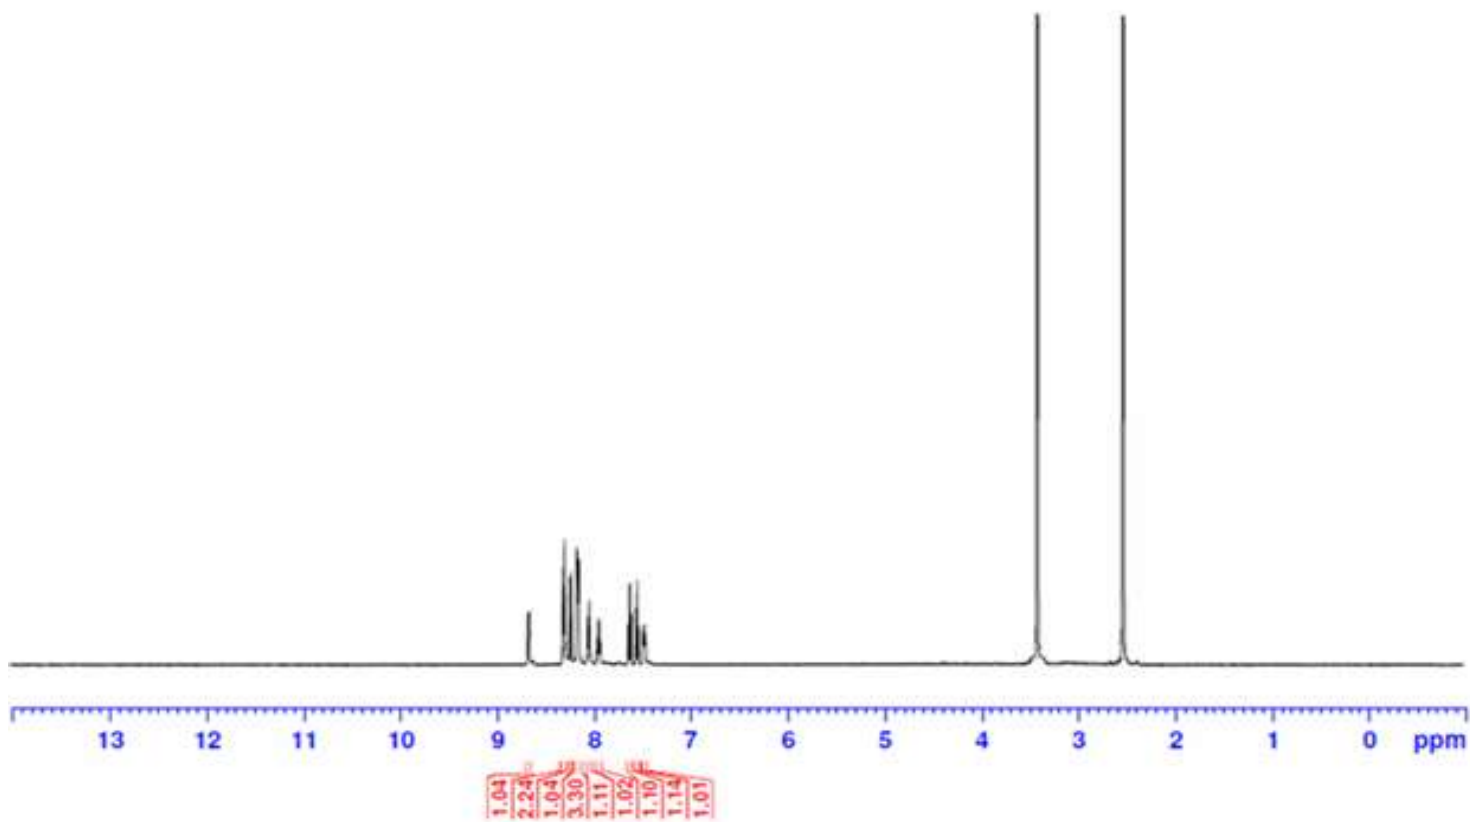

### Compound 3

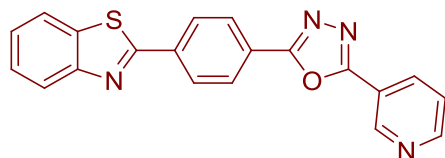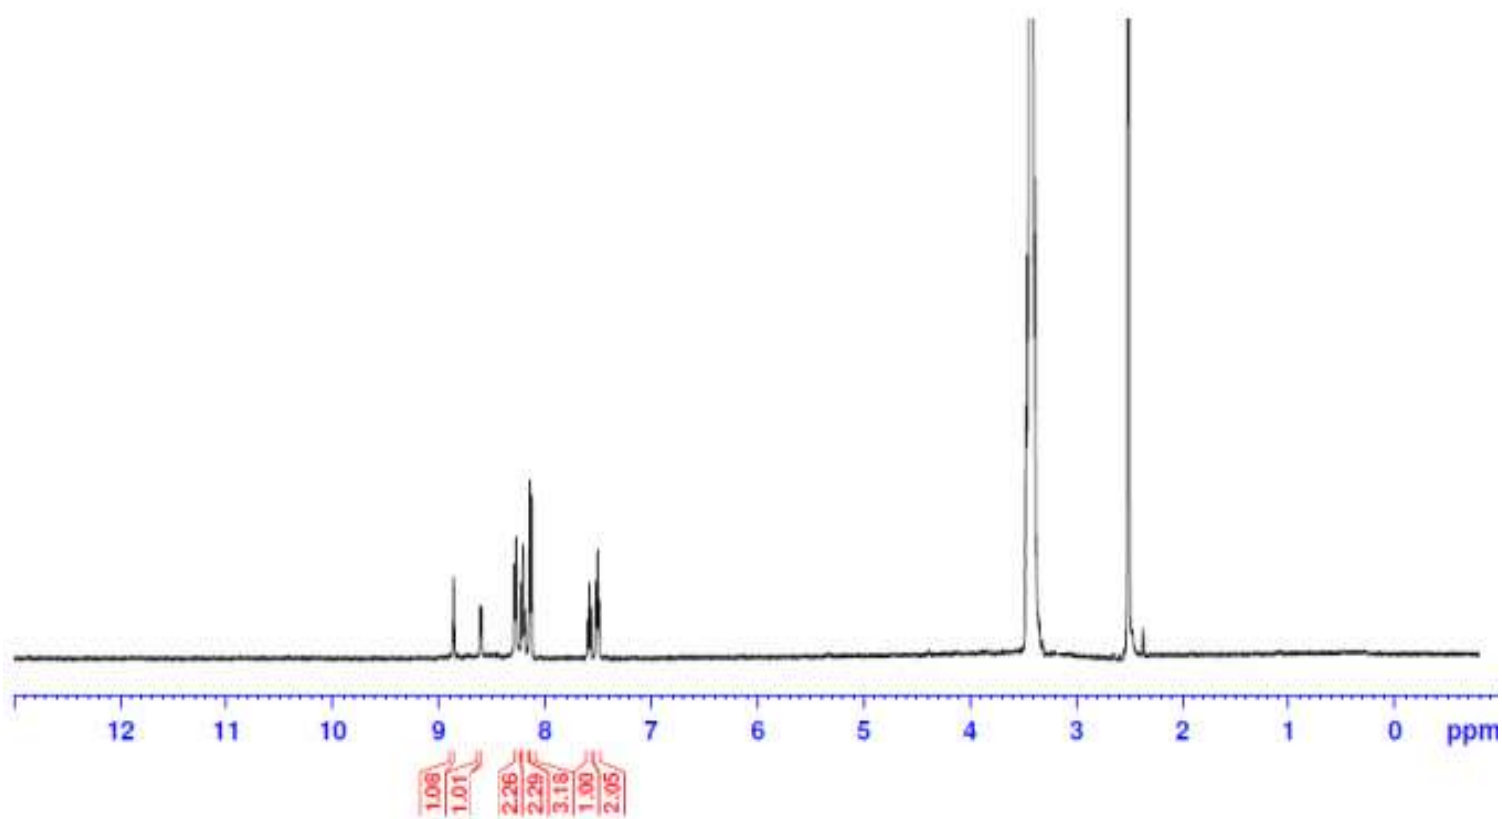

### Compound 4

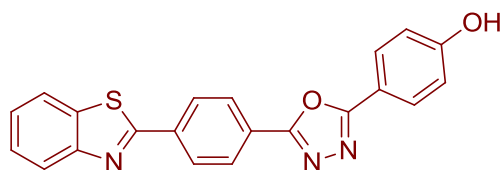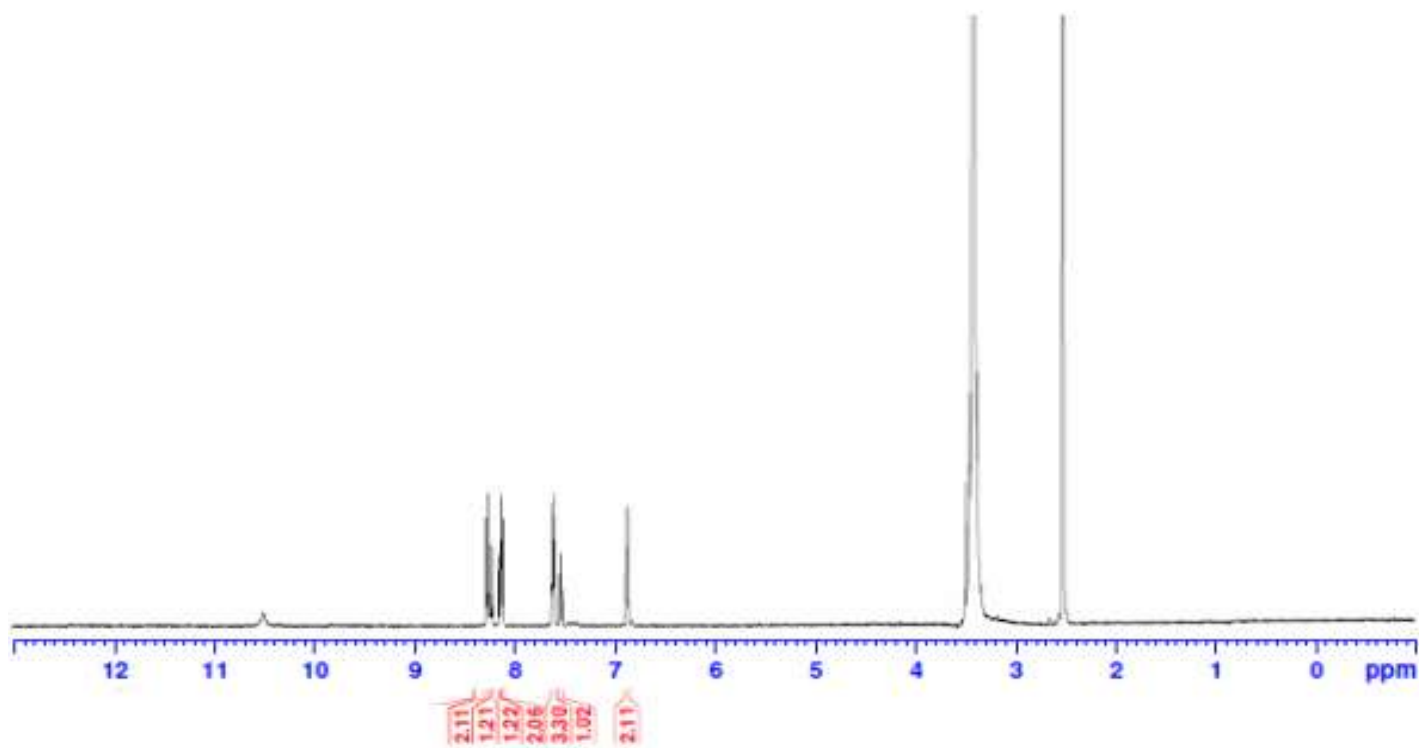

# Compound 5

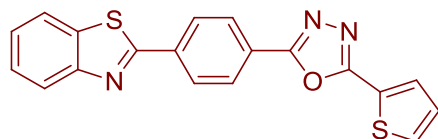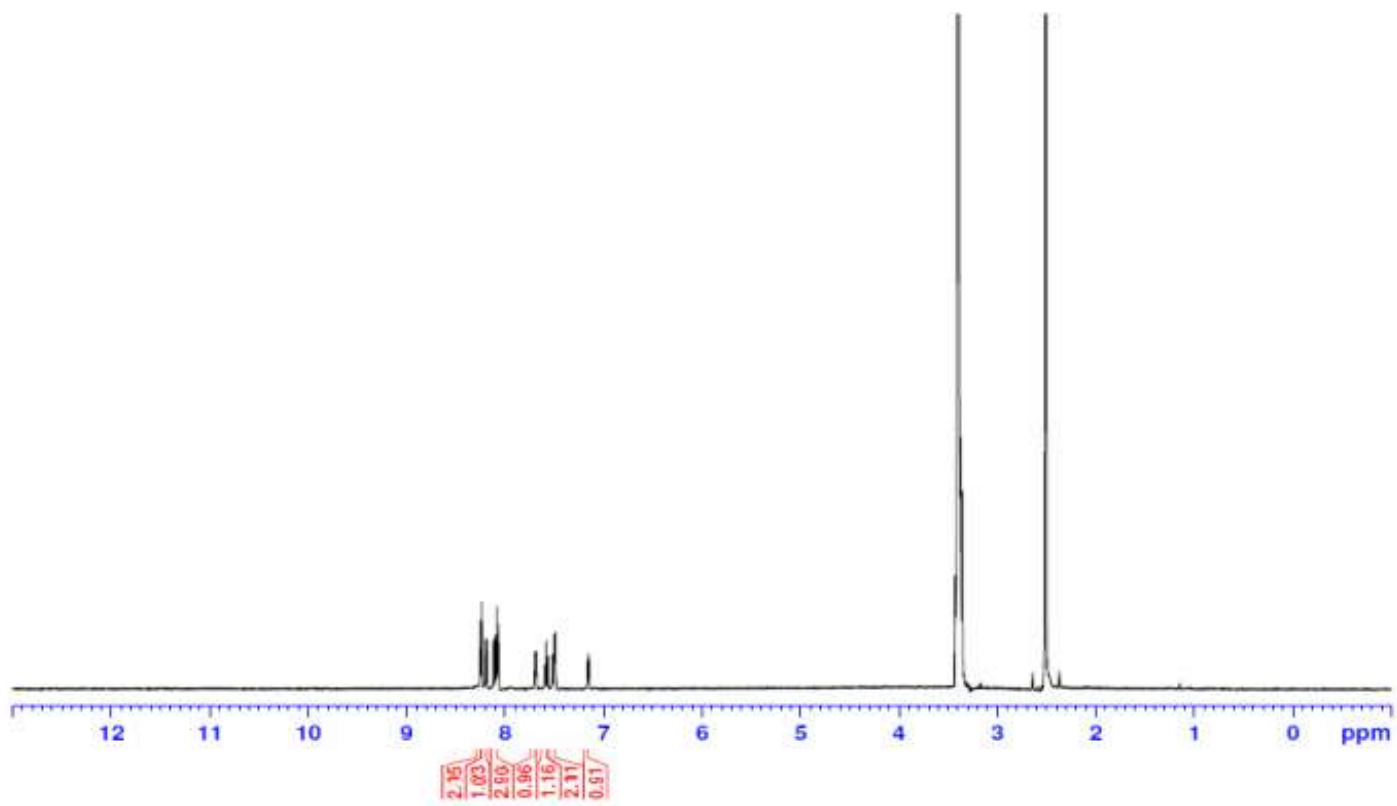

### Compound 6

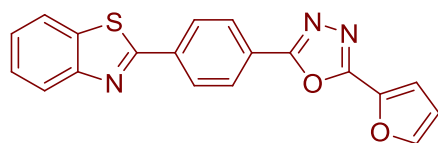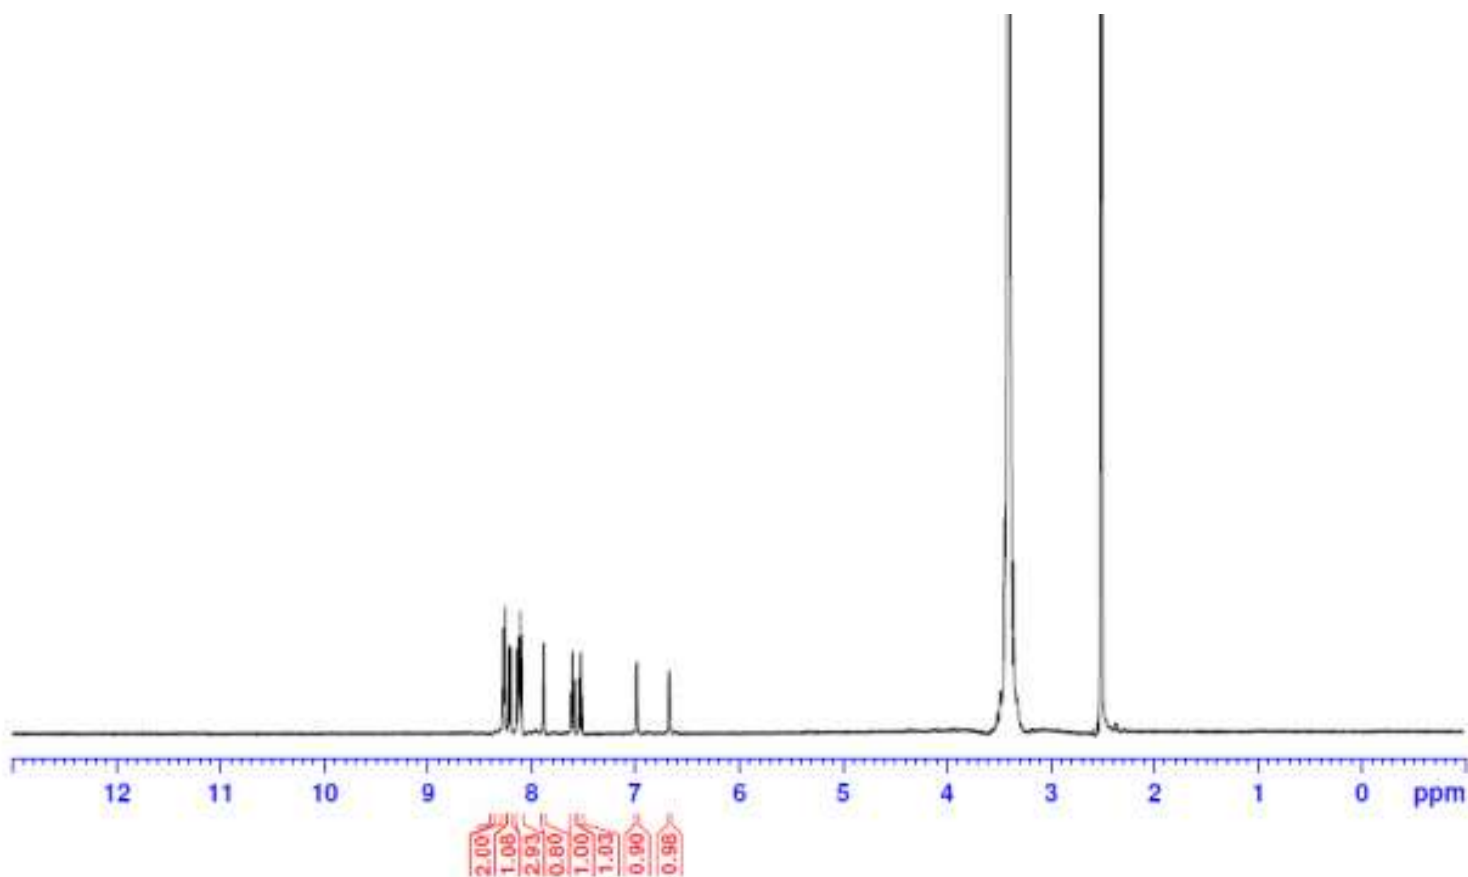

### Compound 7

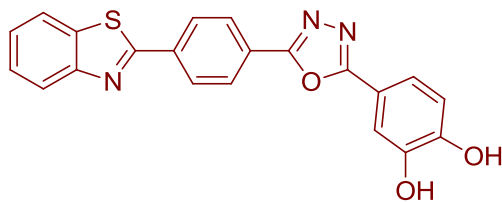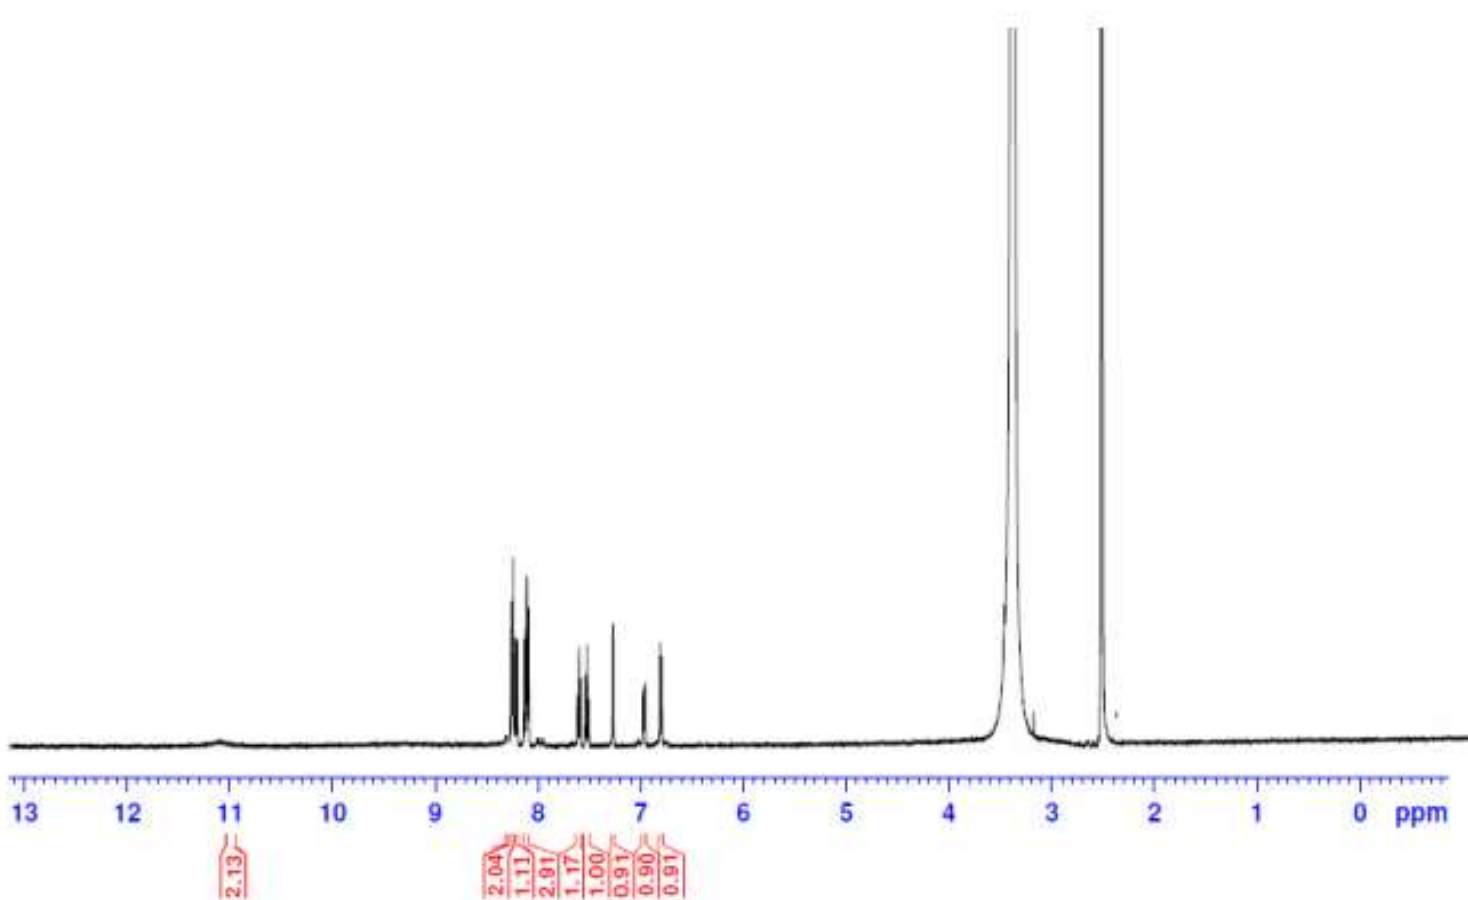



# Compound 8

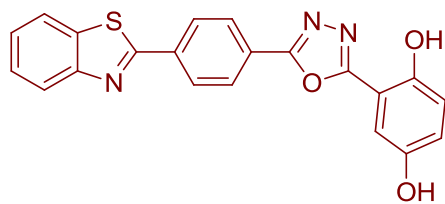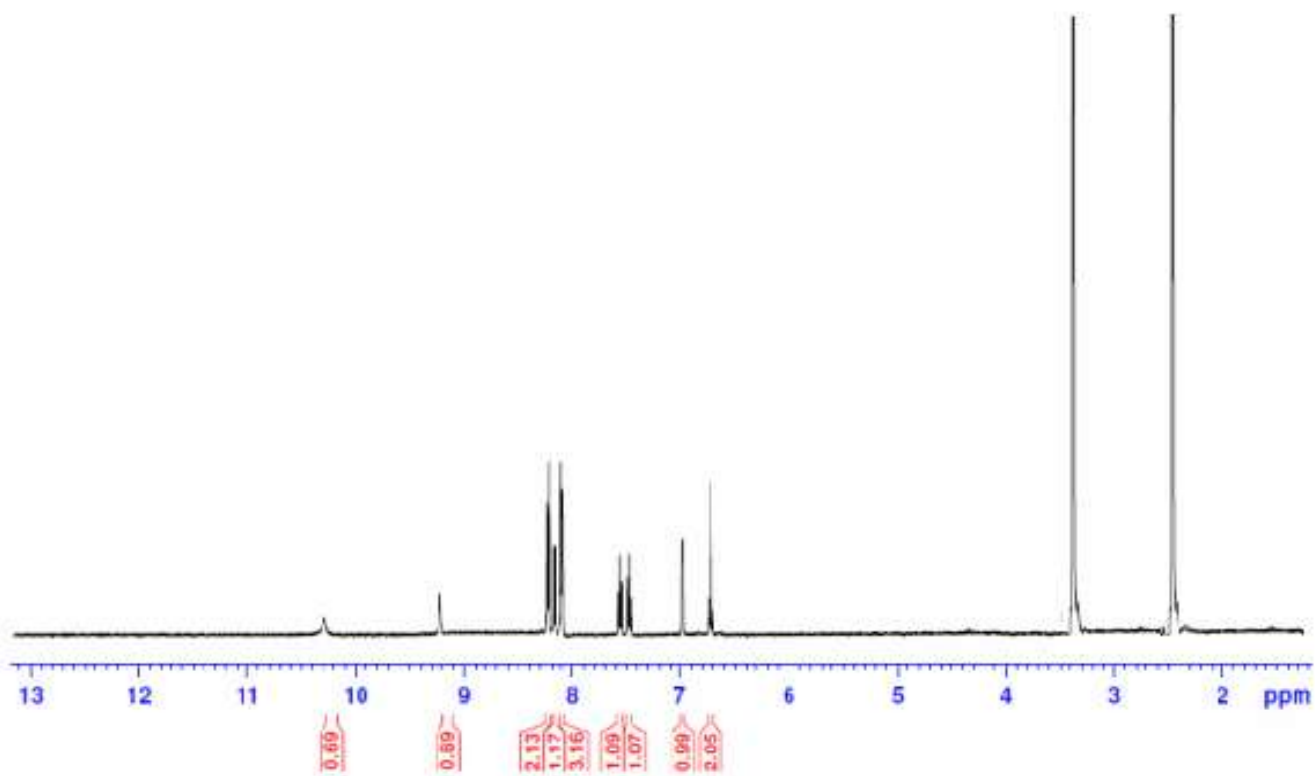

### Compound 9

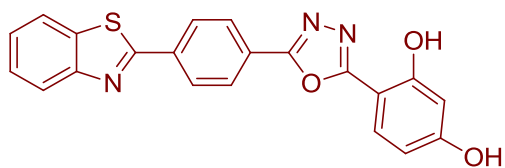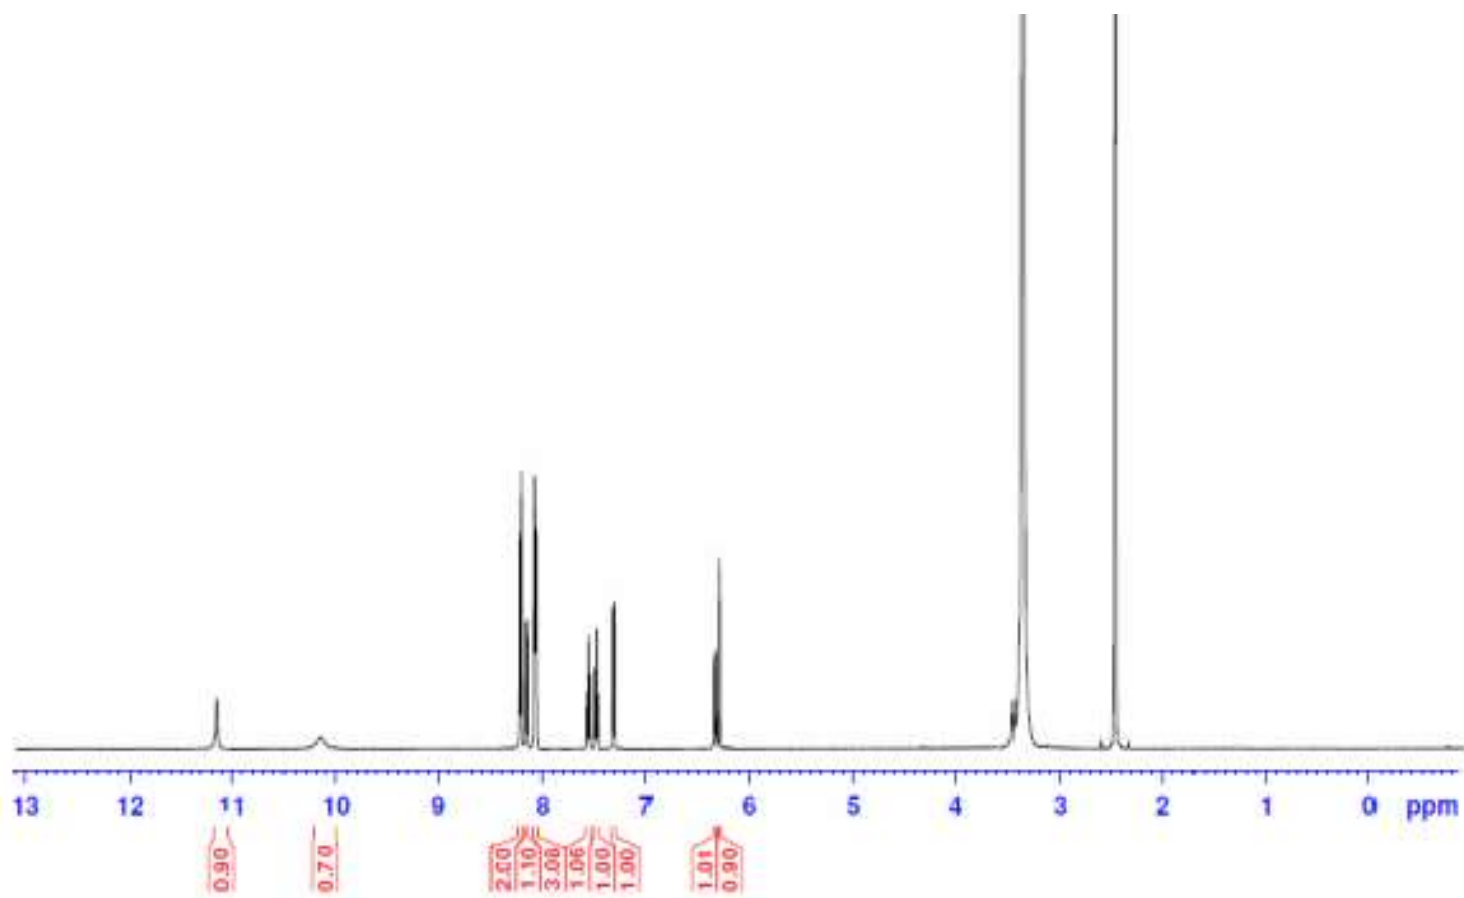

### Compound 10

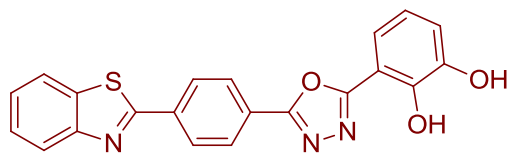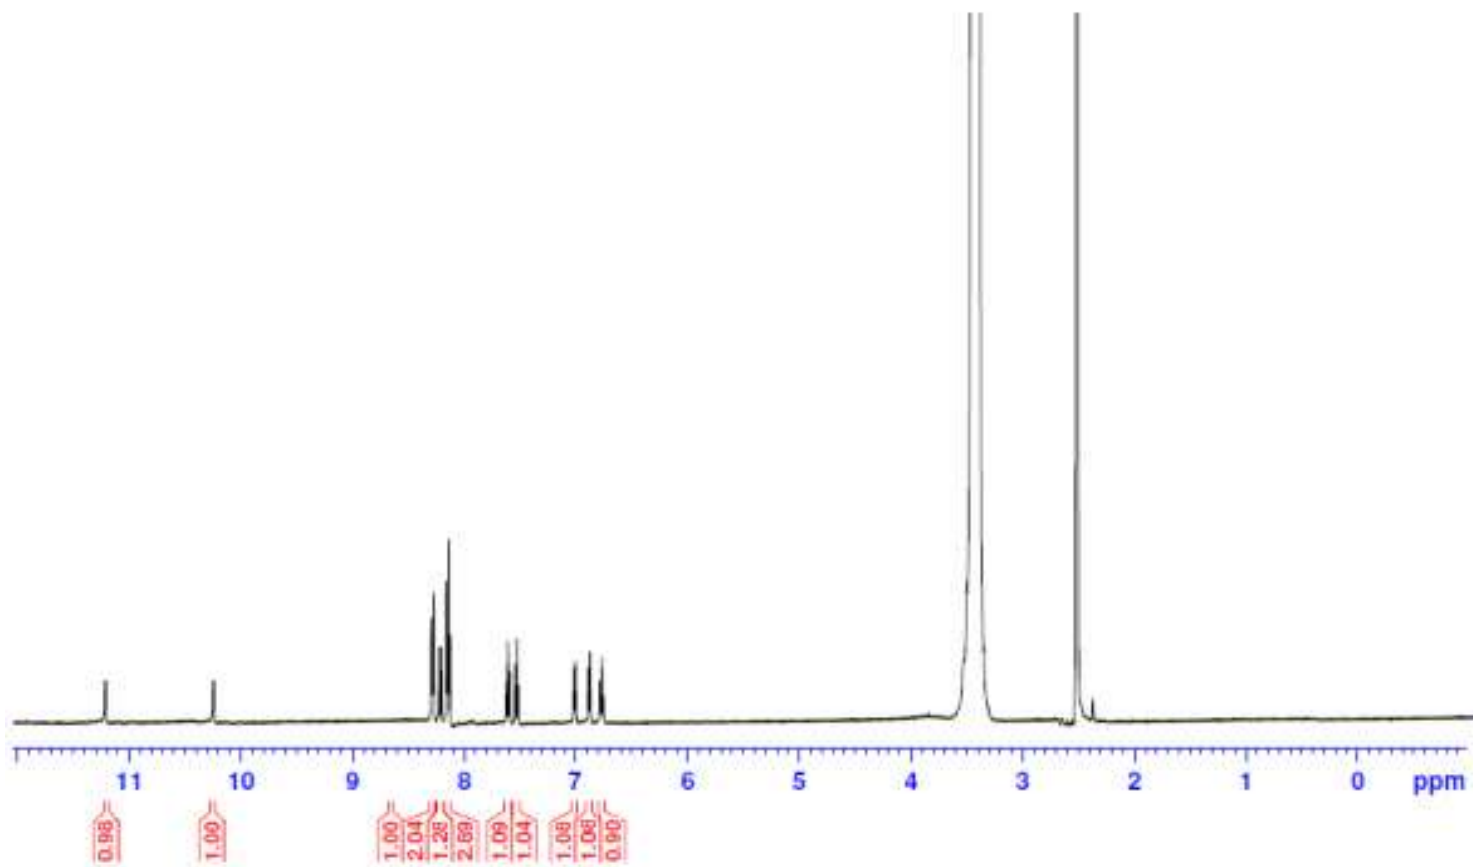

# Compound 11

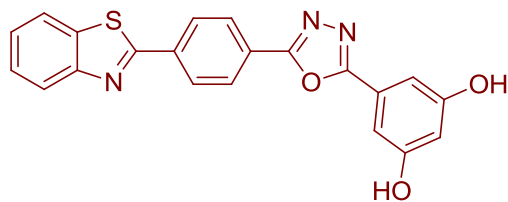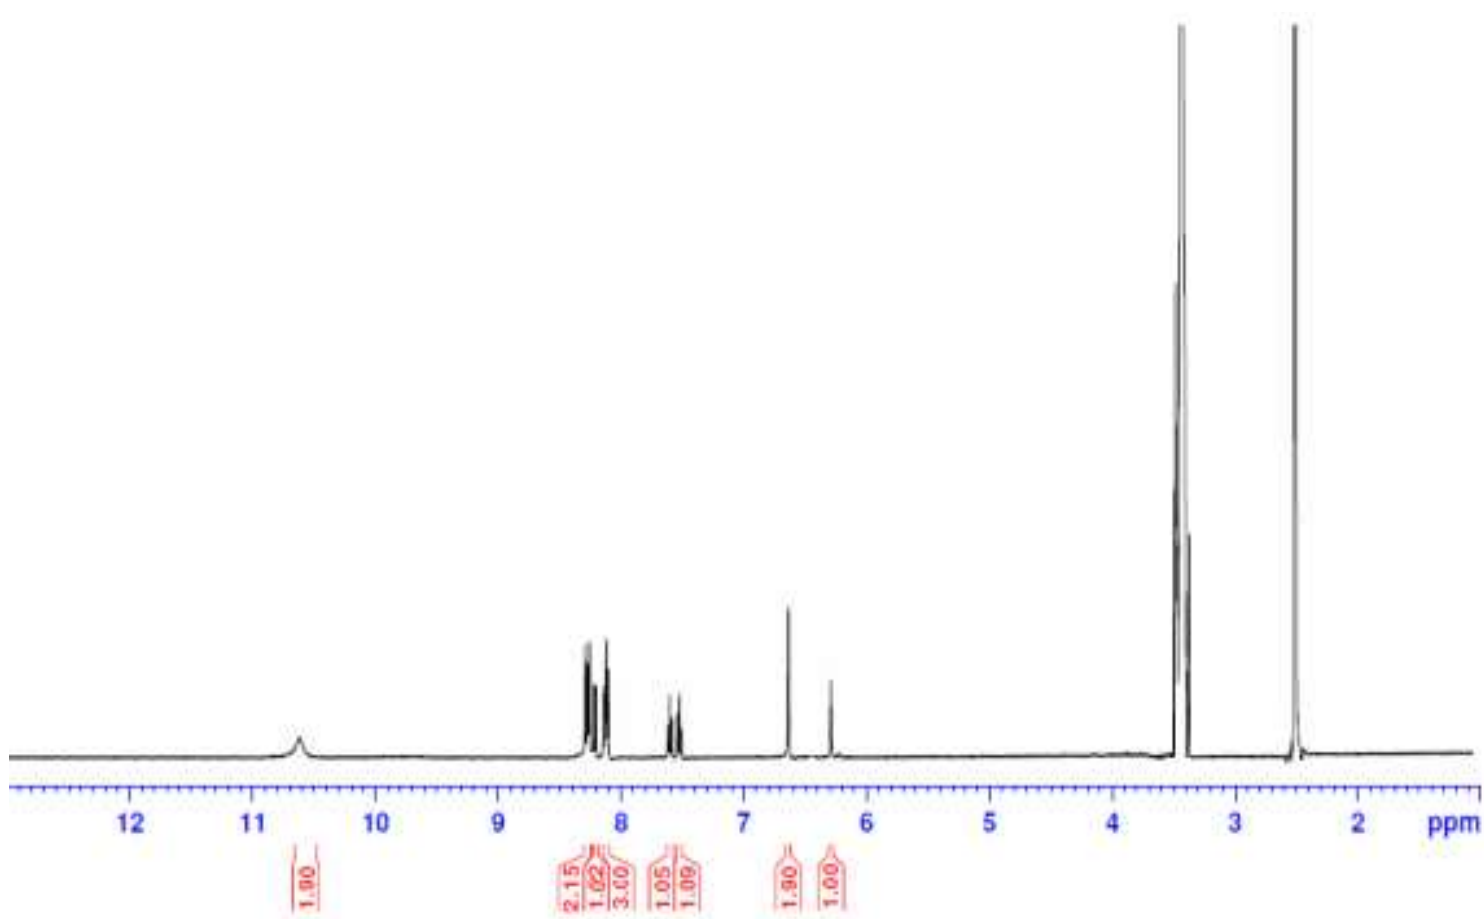

# Compound 12

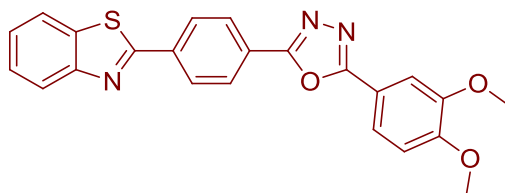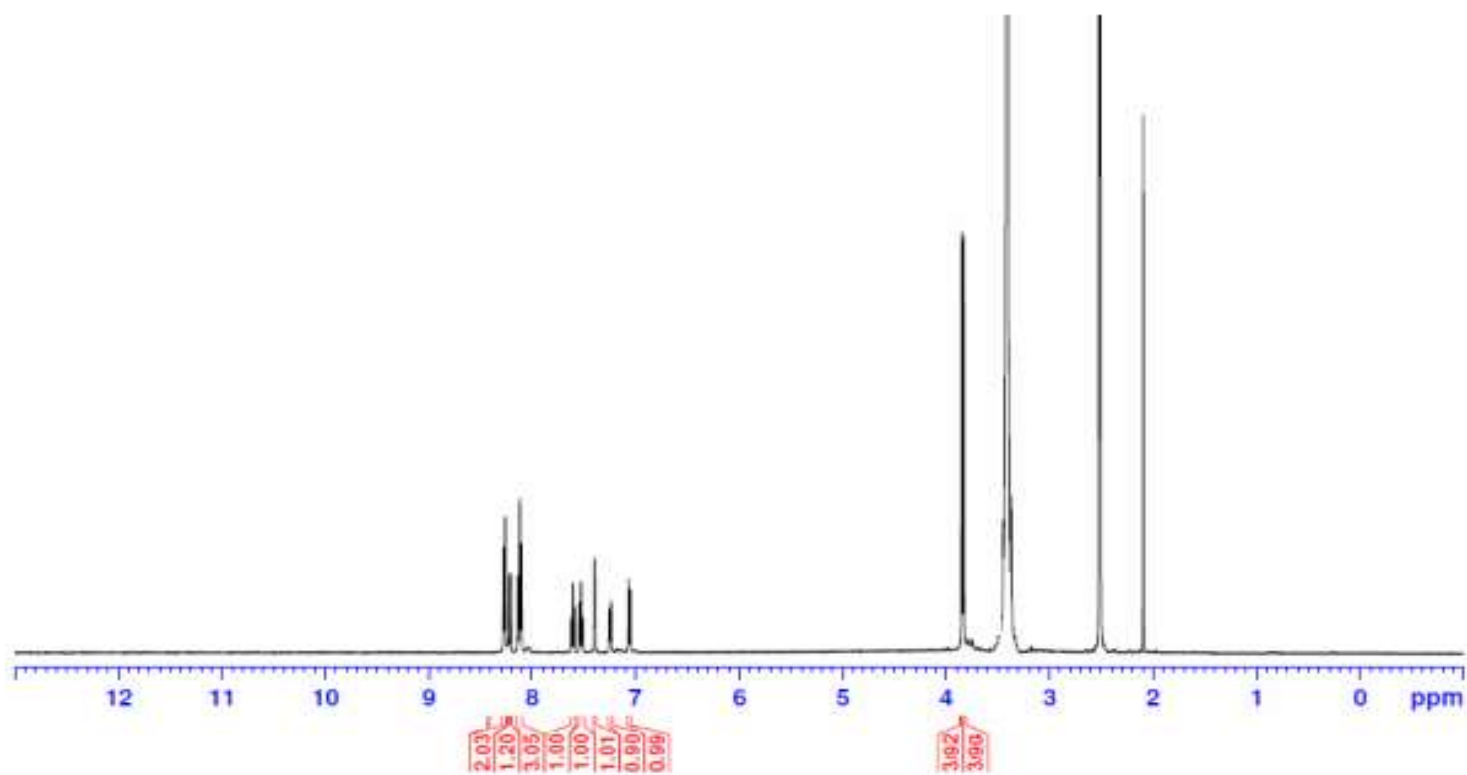

### Compound 13

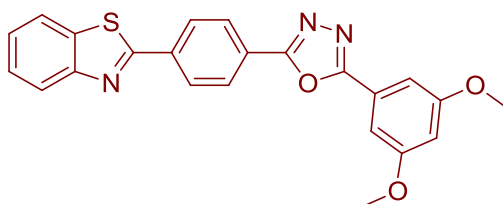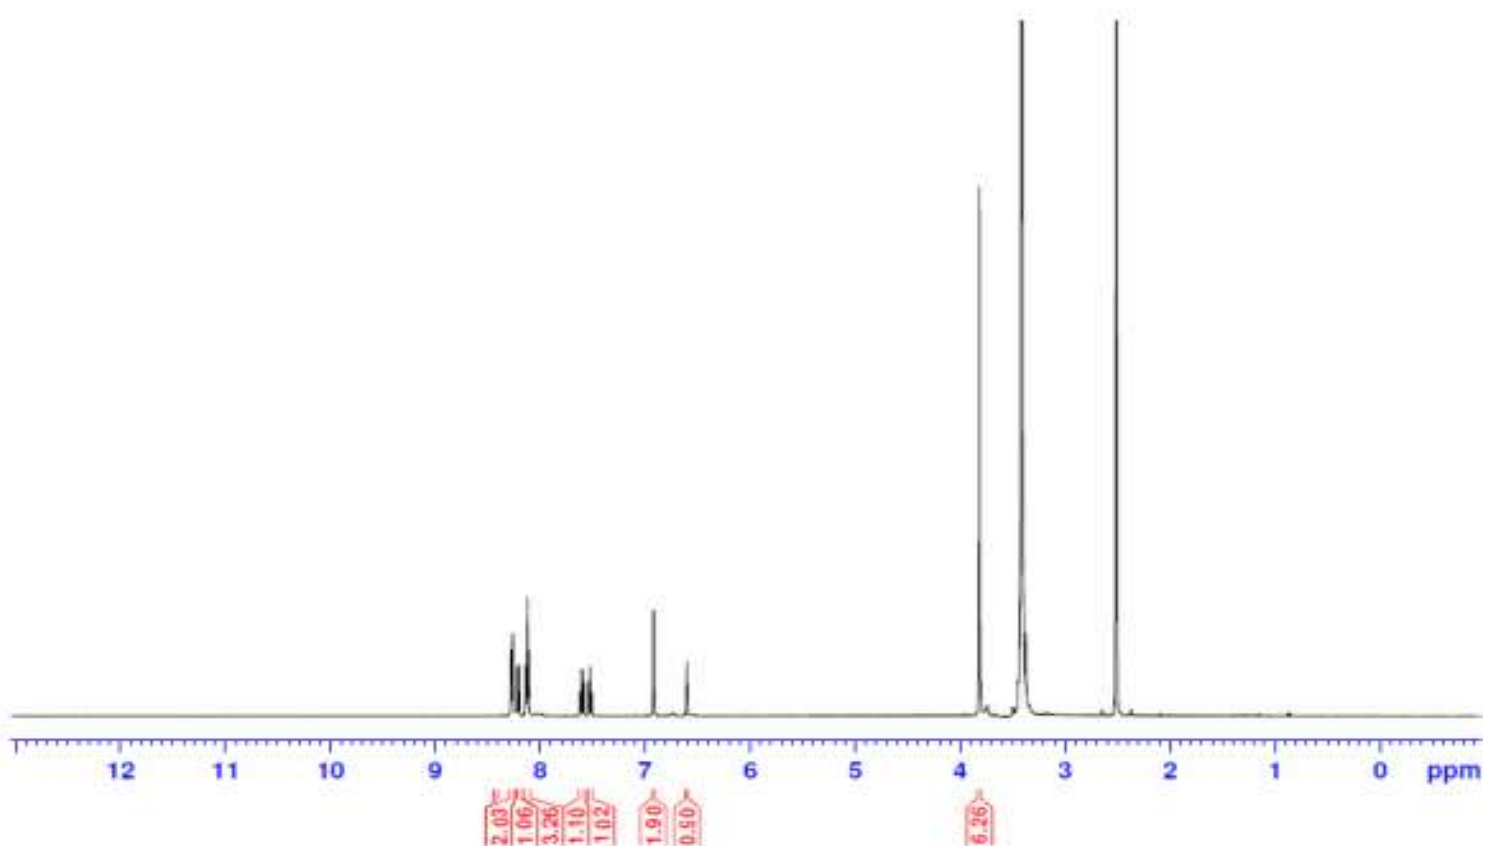

### Compound 14

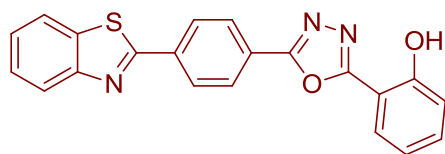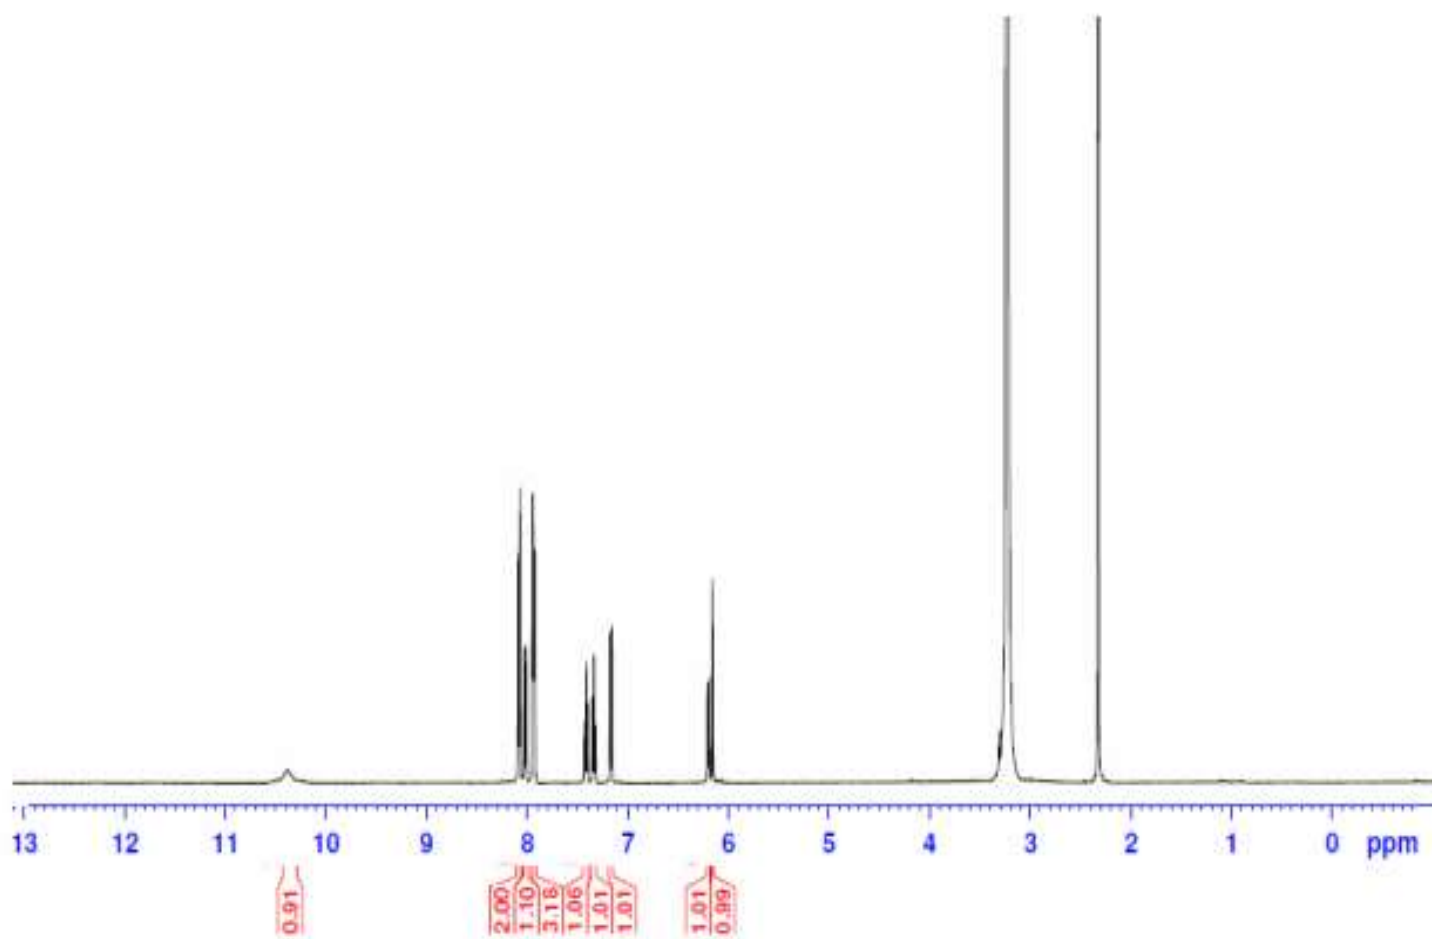

### Compound 15

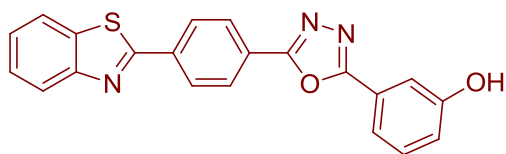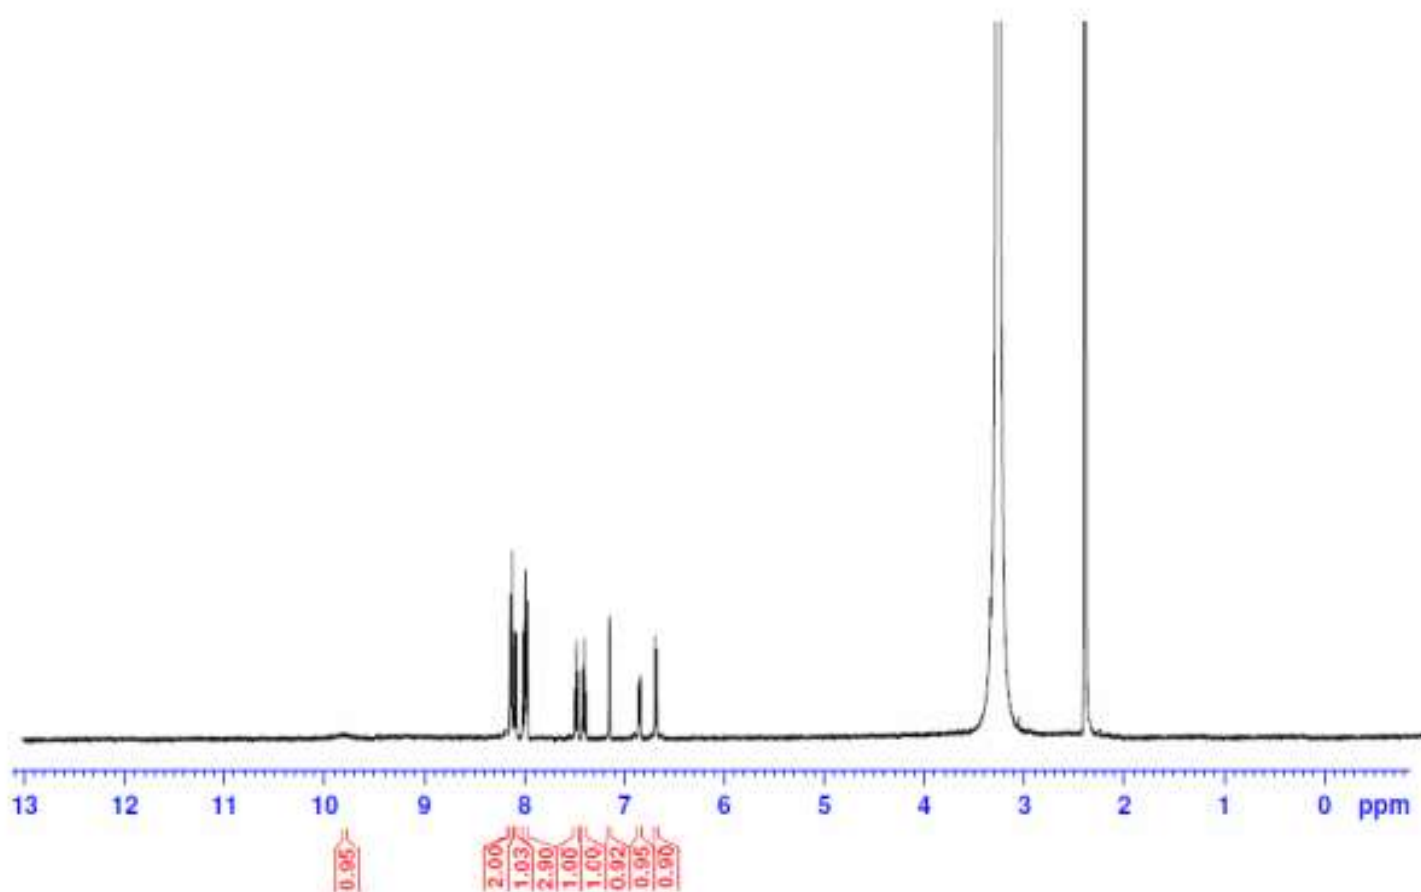



### Compound 16

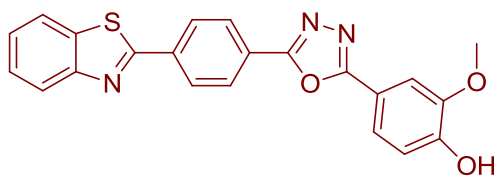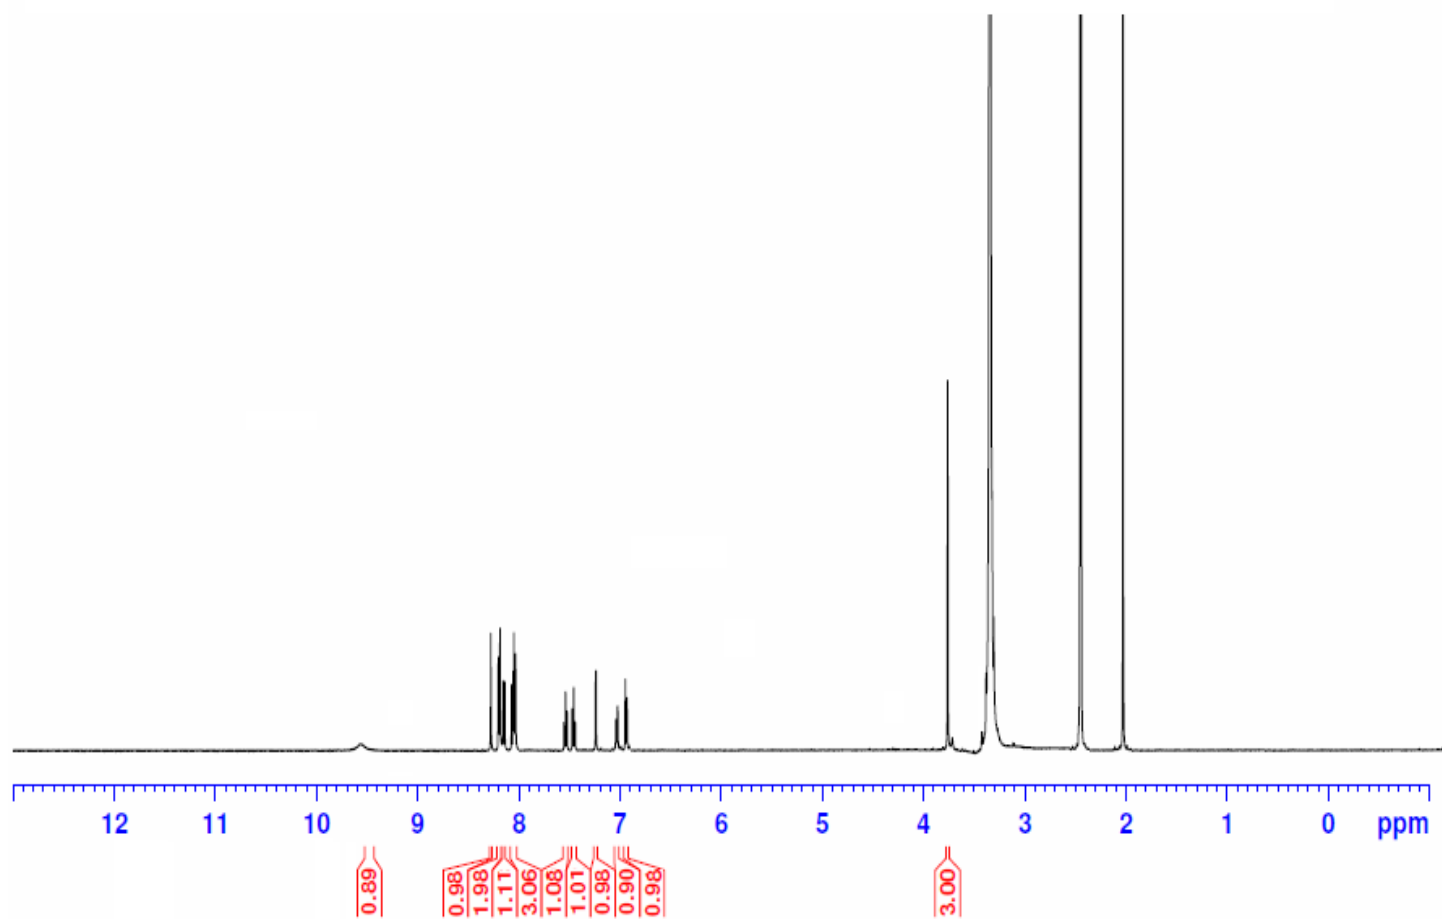

### Compound 17

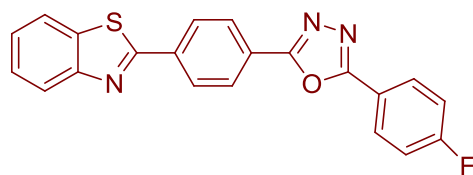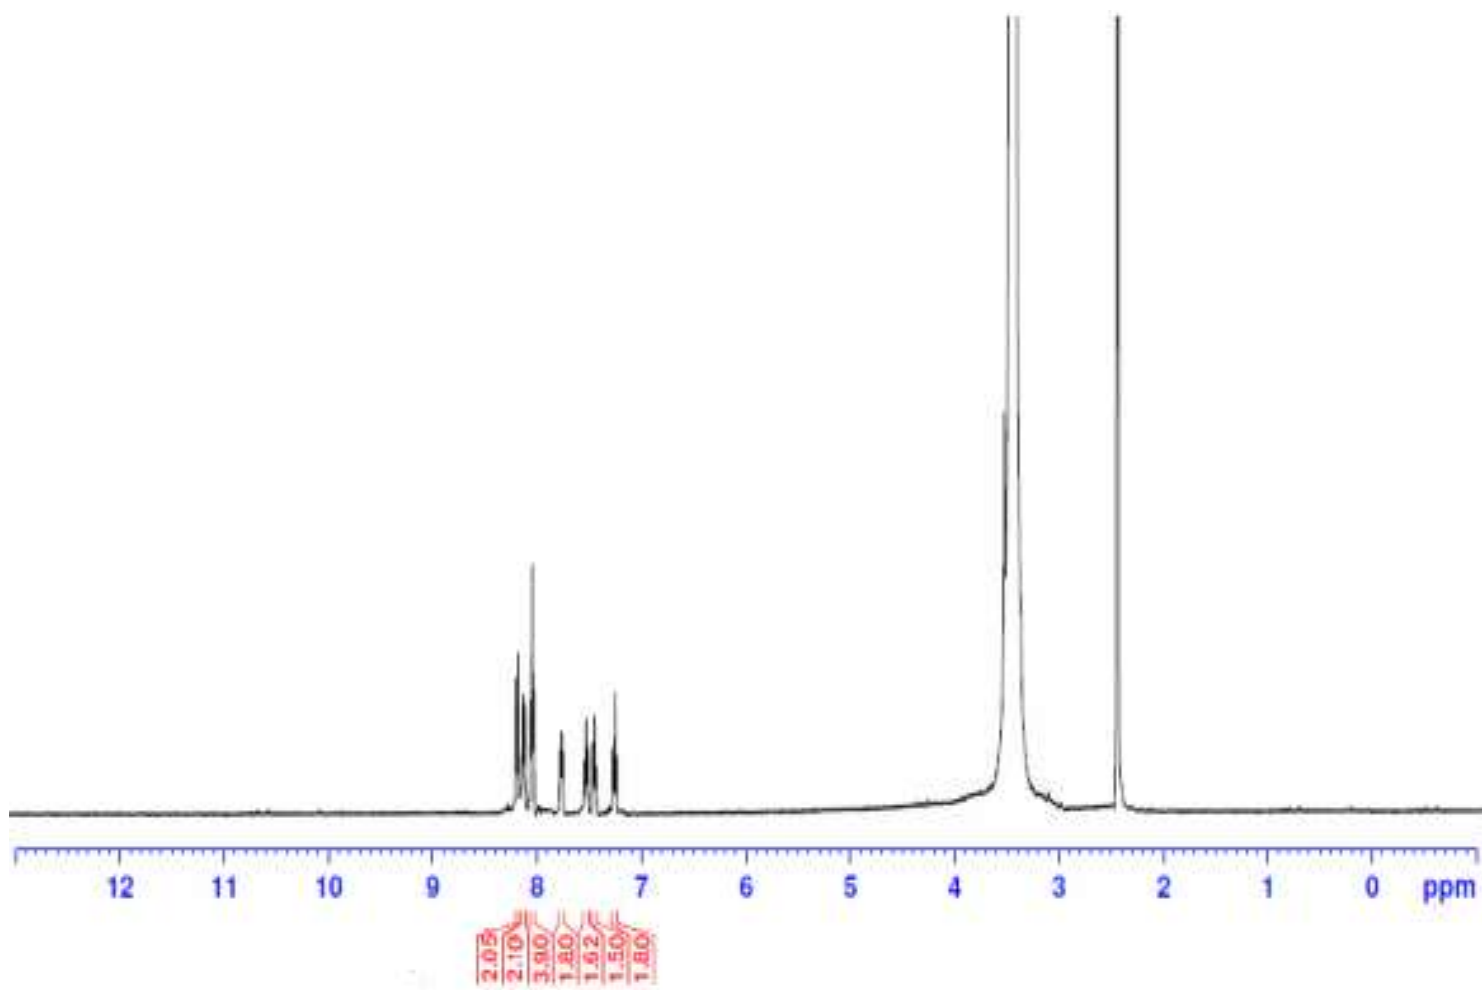

### Compound 18

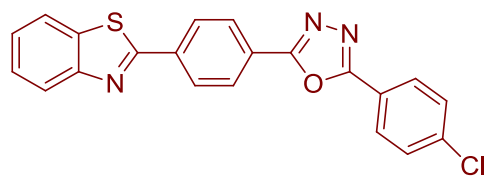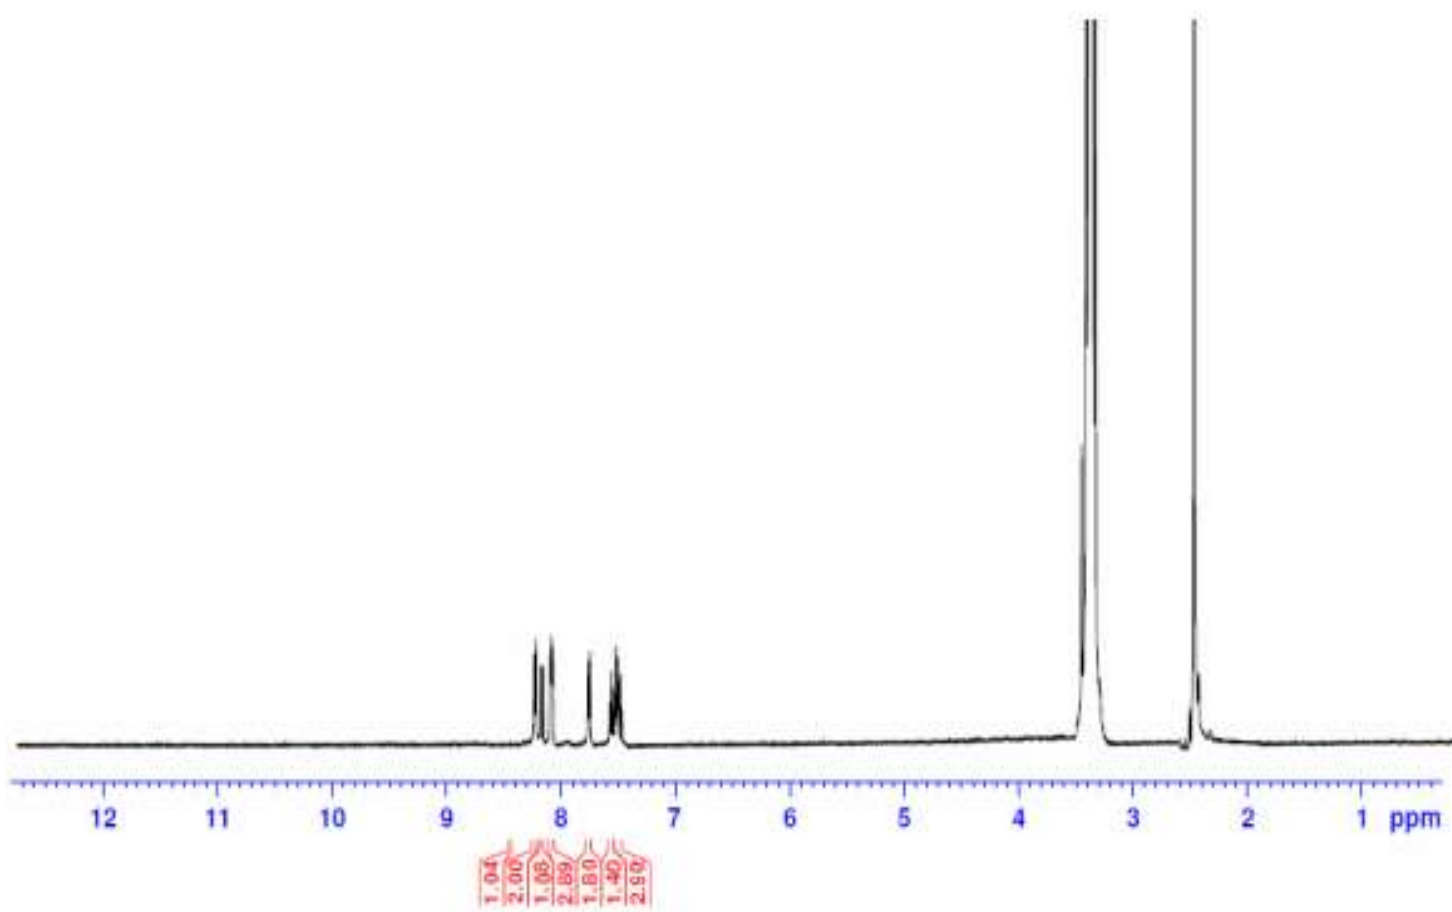

### Compound 19

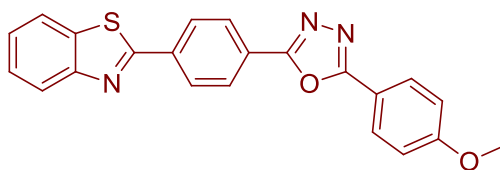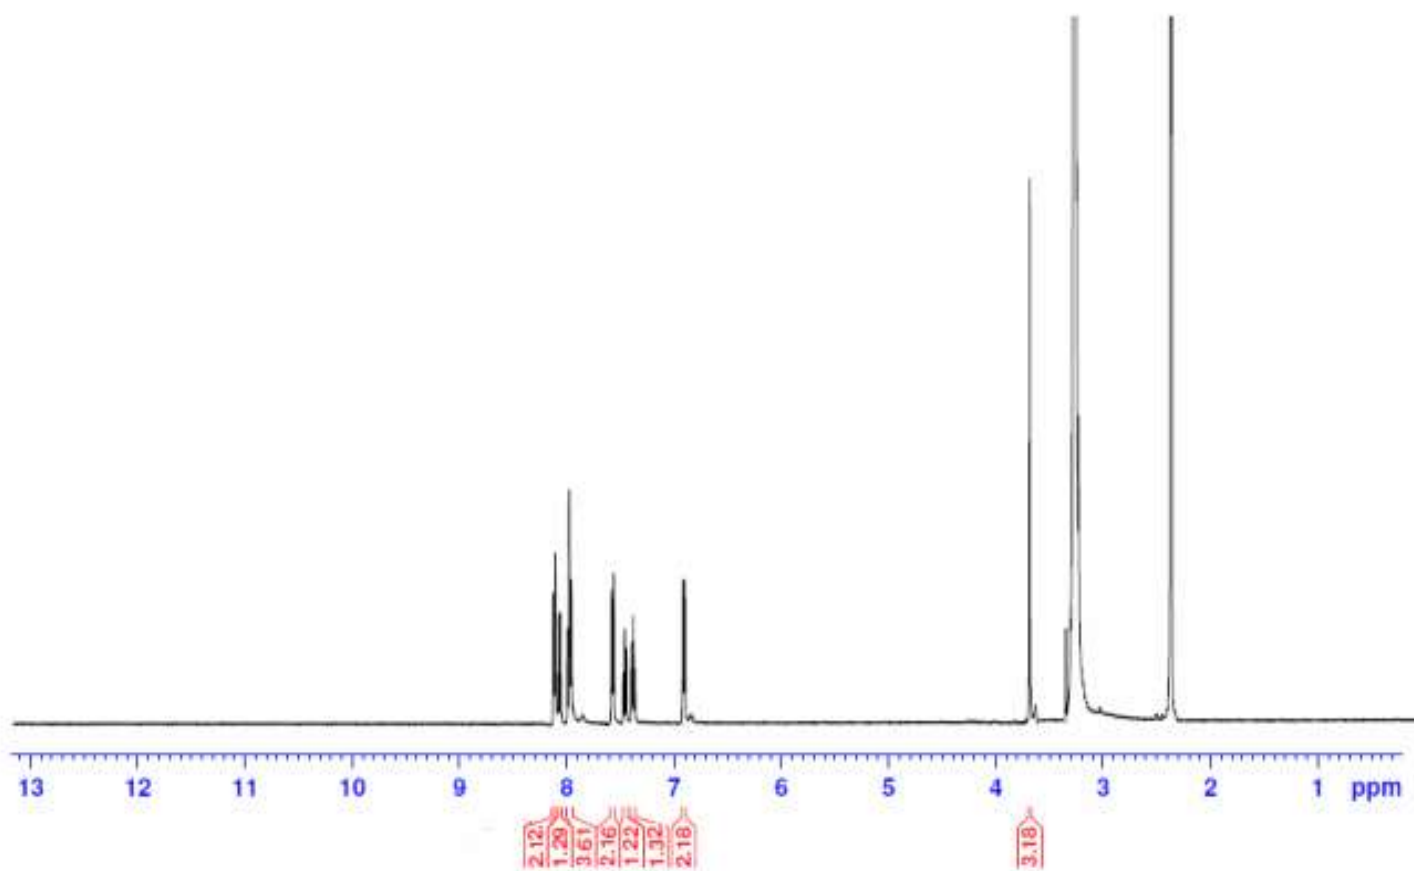

### Compound 20

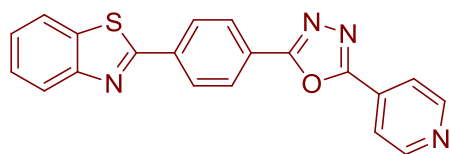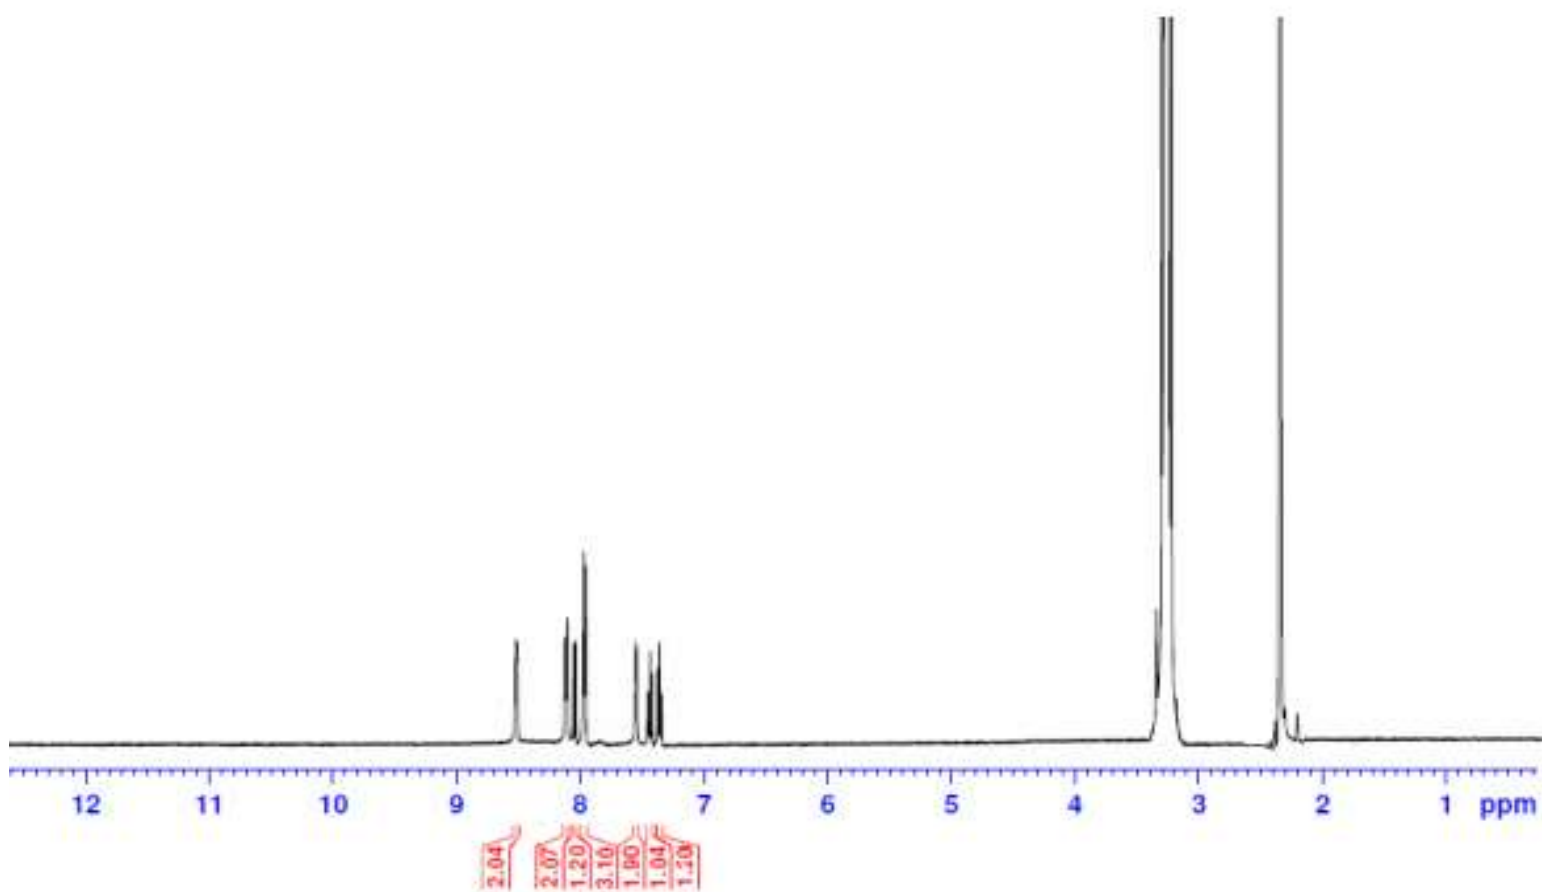

Supplement: c5ra23072a1.pdf [file c5ra23072a1.pdf]
